## Public health impacts of an imminent Red Sea oil spill

Benjamin Q Huynh<sup>1</sup>, Laura H Kwong<sup>2</sup>, Mathew V Kiang<sup>3,4</sup>, Amir M Mohareb<sup>5,6</sup>, Aisha O Jumaan<sup>7</sup>, Sanjay Basu<sup>8,9,10,11</sup>, Pascal Geldsetzer<sup>12,13</sup>, Fatima M Karaki<sup>14\*</sup>, David H Rehkopf<sup>3\*</sup>

1 Department of Biomedical Data Science, Stanford University School of Medicine, Stanford, CA, USA

2 Woods Institute for the Environment, Stanford University, Stanford, CA, USA

3 Department of Epidemiology and Population Health, Stanford University School of Medicine, Stanford, CA, USA

4 Harvard FXB Center for Health and Human Rights, Harvard University, Boston, MA, USA

5 Division of Infectious Diseases, Massachusetts General Hospital, Boston, MA, USA

6 Department of Medicine, Harvard Medical School, Boston, MA, USA

7 Yemen Relief and Reconstruction Foundation, Mercer Island, WA, USA

8 Center for Primary Care, Harvard Medical School, Boston, MA, USA

9 Research and Population Health, Collective Health, San Francisco, CA, USA

10 School of Public Health, Imperial College, London, UK

11 Institute of Health Policy, Management & Evaluation, University of Toronto, Toronto, ON

12 Division of Primary Care and Population Health, Department of Medicine, Stanford University School of Medicine, Stanford, CA, USA

13 Heidelberg Institute of Global Health, Heidelberg University, Heidelberg, Germany

14 Refugee and Asylum seeker Health Initiative, Department of Medicine, University of California San Francisco, San Francisco, CA, USA

\*Equal contribution

Abstract word count: 63

Main text word count: 1444

Methods word count: 487

Correspondence: [benhuynh@stanford.edu](mailto:benhuynh@stanford.edu)

### Abstract

The FSO *Safer*, a deteriorating oil tanker containing 1.1 million barrels of oil, has been deserted off the coast of Yemen since 2015, and the risk of a massive oil spill is increasingly likely. Here we model public health impacts of the *Safer* spilling and predict severe disruption to fuel, food, and clean water access, stressing the need to address this impending disaster.

## Main

Since 2015, war and blockade in Yemen has made it the site of "the world's worst humanitarian disaster."<sup>1</sup> A major consequence has been the abandonment of the FSO *Safer*, a deteriorating oil tanker moored 4.8 nautical miles off the Red Sea coast of Yemen. Concerns of a massive spill have arisen as the *Safer*, designated out-of-class since 2016 and not maintained since the start of the conflict, continues to deteriorate. The *Safer* contains 1.1 million barrels of oil, more than four times the amount spilled in 1989 by the *Exxon Valdez*.<sup>2</sup> The prospective spill threatens to harm the environment, economy, and public health of the countries bordering the Red Sea.

While the potential long-term environmental and economic consequences of a major oil spill are well-documented,<sup>2,3</sup> the immediate public health impacts are unclear. Yemen is highly dependent on aid, with 18 million people requiring clean water assistance and 16 million requiring food assistance.<sup>1</sup> The extent to which the anticipated spill will disrupt aid to Yemen critically informs the question of whether and with what urgency interventions should be deployed. Here we assess the immediate-term public health impacts in the event of the *Safer* spilling, estimating disrupted access to fuel, food, and clean water, and initial air pollution-related health effects.

We simulate the *Safer* spilling over a variety of historical weather conditions and find most simulated spills tend to move towards Yemen's northwest coast. We observe seasonal variation from our models: in the summer, spills tend to move southeast and further along Yemen's coastline, but in the winter, spills tend to move north along the Red Sea coast. Uncertainty in the estimates indicate a wide range of possible trajectories across the Red Sea, showing the possibility of movement in either direction for both seasons. We estimate it will take 6-10 days for the oil to reach Yemen's western coastline. If the spill spreads unmitigated for three weeks, oil will likely impede passage through the Gulf of Aden (Figure 1).

Ports and desalination plants, crucial for providing fuel, food, and water, stand to be disrupted by the spill. For the key Red Sea ports of Yemen we estimate high surface oil concentrations two weeks after the spill: Hudaydah and Salif are above the 90th percentile for surface oil concentration amongst areas exposed to the spill when averaged over simulations. We also observe from our models that by three weeks, spills can reach as far as the port of Aden, outside of the Red Sea, as well as desalination plants and ports in Eritrea and Saudi Arabia (Supplement Table 1).

The spill and subsequent closure of ports will disrupt fuel transport across the Red Sea, rerouting many shipments around Africa. Yemen in particular relies heavily on fuel imports for vital functions such as health services and water access, with 90-97% of its fuel usage coming from imports.<sup>4</sup> We estimate that for each month of Red Sea port closure, delivery of 206,723 (168,732- 244,713) metric tons of fuel for Yemen will be disrupted, equivalent to 38% of the national fuel requirement.<sup>5</sup> We consequently expect fuel prices in Yemen to spike; when the

blockade was tightened to fully close ports in November 2017, fuel prices sharply rose across the country, with prices in Hudaydah rising by 72% (Supplement Figure 1).

The oil spill will also threaten clean water access for an estimated 1 to 1.9 million people through potential contamination of desalination plants. In the Red Sea region, we estimate potential disruption towards plants responsible for a total of 77,000 m<sup>3</sup> of clean water daily in the summer, and 362,000 m<sup>3</sup> in the winter (Supplement Table 2). We additionally expect water access in Yemen to be severely disrupted by fuel shortages if the spill closes ports; during the full port closures in November 2017, 8 million people in Yemen lost access to running water due to the majority of water access depending on fuel-powered pumps or trucked water.<sup>4,6</sup>

Similarly, food security will be threatened by potential food aid disruptions and fishery closures. In the event of Yemen's Red Sea ports closing within two weeks of the spill, food aid will be disrupted for an estimated 5.7 million (4.7-6.7 million) people who currently require food assistance. We estimate that if Aden's port also closed, a total of 8.4 million (6.9-9.8 million) people will not receive food aid. In the event fisheries close in the southern Red Sea, we estimate 172 metric tons of fish yield will be lost each day; in the event fisheries near Aden close, we estimate a total of 1217 metric tons in daily lost fish yield.

We predict moderate short-term health effects from air pollution, with estimates for the average increased risk of cardiovascular and respiratory hospitalizations ranging from 5.86% (5.77-5.94) for a 72-hour winter spill affecting 713,561 (680,133-746,989) people, to 31.65% (30.94-32.35) for a 24-hour summer spill affecting 10,956,253 (10,767,808-11,144,698) people (Supplement Table 3). The exposure period is roughly equivalent to the spill duration; we estimate 50.6% (50.41-50.79%) of the oil will evaporate within 24 hours of leaking from the vessel (Supplement Figure 2). Seasonality effects are present, with simulated air pollution traveling west into the sea during the winter, and east into Yemen during the summer (Figure 2).

The public health impact of the *Safer* spilling will be catastrophic, particularly for Yemen. Fuel disruption will shut down hospitals and essential services, as Yemen already faces fuel shortages and only 50% of its health services are functional.<sup>7,8</sup> Both fuel shortages and contamination of desalination plants will worsen an existing water crisis, potentially leading to a resurgence of water-borne infectious diseases.<sup>9,10</sup> Disruption to food aid and fisheries will exacerbate an ongoing famine.<sup>1</sup> Imports of medical supplies from aid groups will likely be disrupted at similar rates as food and fuel, further destabilizing health services.<sup>8,9</sup> The air pollution from the spill is moderate in comparison to the supply disruptions from the spill, but clean-up workers, essential to curbing impacts of the spill, will be at high risk of hospitalization,<sup>14</sup> and the pollution with its resultant increases in respiratory hospitalizations will further strain an already under-resourced healthcare system handling the COVID-19 pandemic.<sup>15</sup> Cleanup efforts will likely be prolonged and logistically difficult given the conflict in the region.

Although our model accounts for a number of uncertainties associated with a future spill, some uncertainties remain. Our model is averaged over simulations based on historical data, but spills often happen due to extreme conditions, so the actual spill may manifest differently

than the scenarios we present. The data we use to model the spill and downstream effects are of variable quality, so our results may be affected by measurement error. We assume that the spill will occur and that ports, desalination plants, and fisheries will be disrupted when oil reaches them. We do not provide expected durations for port and desalination plant closures since we are unable to predict the timing of cleanup efforts. Our models also do not fully account for wave turbulence, and our air pollution models are subject to several levels of uncertainty (see Supplement).

Despite the uncertainty inherent to our modeling, our evidence demonstrates that an oil spill from the *Safer* poses an extreme public health risk to the people of the surrounding area, with Yemen bearing the largest impact. Our results show the spill will jeopardize access to fuel, food, and water in Yemen, a country lacking adequate supplies of all three. Other countries bordering the Red Sea will also incur the burden of the spill with port closures and disruptions to desalination plants and the fishing industry. This public health disaster could be averted by finding a long-term solution to handling the oil aboard the *Safer*, underscoring the need for urgent action from the international community.

## Methods

We modeled the spill using the pyGNOME library from the National Oceanic and Atmospheric Administration (NOAA). As model inputs, we used the characteristics of the crude oil onboard the *Safer*, Marib Light, as well as the historical currents and wind data of the region. We performed 1000 Monte Carlo simulations each for both summer (June-August) and winter (December-February), varying time of day and date. Seasons were chosen based on known current patterns in the Red Sea.<sup>16</sup> We restrict simulations to three-week timelines due to predictability limits inherent to oil spill modeling and uncertainty in clean-up efforts.<sup>17</sup>

Each simulation had 1000 particles representing the oil trajectory based on historical weather conditions, with a surface concentration value for each particle. For each scenario, we calculated the average surface concentration value at each point over all 1000 simulations. Each simulation also had 1000 uncertainty particles that simulate the oil trajectory through sensitivity analyses that assume extreme conditions. We computed the convex hull from the locations of all uncertainty particles from all 1000 simulations, and plotted it as the uncertainty region for the oil trajectory within which approximately 90% of spill trajectories are expected to fall.<sup>18</sup>

To calculate the evaporation rate of Marib Light, we used NOAA's Automated Data Inquiry for Oil Spills model. As inputs, we used data on the oil type, gridded winds, gridded currents, water salinity, and water temperature. We performed 1000 Monte Carlo simulations by varying time and date. We restrict the model to run for six days, because it does not account for factors, such as biodegradation or photooxidation, that may affect the weathering rate.

For air pollution modeling, we used NOAA's Hybrid Single-Particle Lagrangian Integrated Trajectory model. We conducted simulations across four scenarios: varying seasons (summer

and winter), and varying spill duration (24-hour release and 72-hour release). We use HYSPLIT's daily runs feature to conduct simulations for every 3 hours from January to March and June to August. Each simulation had 2,500 particles, with a concentration value for each particle. We converted the concentration values to PM2.5 mass and hospitalization rate increases, propagating uncertainty through Monte Carlo simulations (see Supplement).

We estimated fuel disruption by calculating the average monthly fuel imports through Red Sea ports from January to May 2020, prior to fuel imports being restricted. We calculated the fuel price increase from the November 2017 port closures based on historical price data. We estimated disruption to desalination capacity by compiling a dataset of locations and water capacity of all known plants in the region and identifying locations reached by the simulated oil spills (Supplement Table 1). Total water consumption equivalents were computed by multiplying each affected country's share of water amounts by their respective per capita daily usage. We estimated average food disruption based on historical data of imports at Yemeni ports. We estimated fish yield loss from compiled 2016 data for the Southern Red Sea region.<sup>19</sup> All intervals are 95% confidence intervals.

## References

1. United Nations OCHA. Humanitarian Needs Overview Yemen.  
[https://reliefweb.int/sites/reliefweb.int/files/resources/Yemen\\_HNO\\_2021\\_Final.pdf](https://reliefweb.int/sites/reliefweb.int/files/resources/Yemen_HNO_2021_Final.pdf) (2021).
2. Kleinhaus, K. *et al.* A Closing Window of Opportunity to Save a Unique Marine Ecosystem. *Front. Mar. Sci.* **7**, (2020).
3. Liu, X. & Wirtz, K. W. The economy of oil spills: Direct and indirect costs as a function of spill size. *J. Hazard. Mater.* **171**, 471–477 (2009).
4. Alles, L. Missiles and Food: Yemen's man-made food security crisis. 16.
5. United Nations OCHA. Yemen Commodity Tracker. *Yemen Commodity Tracker*  
[https://www.humanitarianresponse.info/sites/www.humanitarianresponse.info/files/documents/files/ocha20yemen20commodity20track20for20q420202020october20to20january202021\\_rev1.pdf](https://www.humanitarianresponse.info/sites/www.humanitarianresponse.info/files/documents/files/ocha20yemen20commodity20track20for20q420202020october20to20january202021_rev1.pdf) (2021).
6. Millions of Yemenis days away from losing clean running water. *Oxfam International*  
<https://www.oxfam.org/en/press-releases/millions-yemenis-days-away-losing-clean-running-water> (2017).
7. Jumaan, A. Yemen humanitarian crisis: Impact on population's health. in (American Public Health Association, 2020).
8. Huynh, B. Q. & Basu, S. Forecasting Internally Displaced Population Migration Patterns in Syria and Yemen. *Disaster Med. Public Health Prep.* 1–6 (2019) doi:10.1017/dmp.2019.73.
9. Camacho, A. *et al.* Cholera epidemic in Yemen, 2016–18: an analysis of surveillance data. *Lancet Glob. Health* **6**, e680–e690 (2018).
10. Minissale, A., Chandrasekharam, D. & Al-Dubai, M. F. M. Desalination of Red Sea and Gulf of Aden Seawater to Mitigate the Fresh Water Crisis in the Yemen Republic. in *Oceanographic and Biological Aspects of the Red Sea* (eds. Rasul, N. M. A. & Stewart, I. C. F.) 195–213 (Springer International Publishing, 2019). doi:10.1007/978-3-319-99417-8\_12.

11. El Bcheraoui, C., Jumaan, A. O., Collison, M. L., Daoud, F. & Mokdad, A. H. Health in Yemen: losing ground in war time. *Glob. Health* **14**, 42 (2018).
12. Burki, T. Yemen health situation “moving from a crisis to a disaster”. *The Lancet* **385**, 1609 (2015).
13. Kimball, A. M. & Jumaan, A. Yemen: the challenge of delivering aid in an active conflict zone. *Glob. Secur. Health Sci. Policy* **5**, 65–70 (2020).
14. Goldstein, B. D., Osofsky, H. J. & Lichtveld, M. Y. The Gulf Oil Spill. *N. Engl. J. Med.* **364**, 1334–1348 (2011).
15. Looi, M.-K. Covid-19: Deaths in Yemen are five times global average as healthcare collapses. *BMJ* **370**, m2997 (2020).
16. Taqi, A. M., Al-Subhi, A. M., Alsaafani, M. A. & Abdulla, C. P. Estimation of geostrophic current in the Red Sea based on sea level anomalies derived from extended satellite altimetry data. *Ocean Sci.* **15**, 477–488 (2019).
17. Barker, C. H. *et al.* Progress in Operational Modeling in Support of Oil Spill Response. *J. Mar. Sci. Eng.* **8**, 668 (2020).
18. General NOAA Operational Modeling Environment (GNOME) technical documentation. <https://repository.library.noaa.gov/view/noaa/2620>.
19. Palomares, M. L. D. *et al.* Fishery biomass trends of exploited fish populations in marine ecoregions, climatic zones and ocean basins. *Estuar. Coast. Shelf Sci.* **243**, 106896 (2020).

## Figures

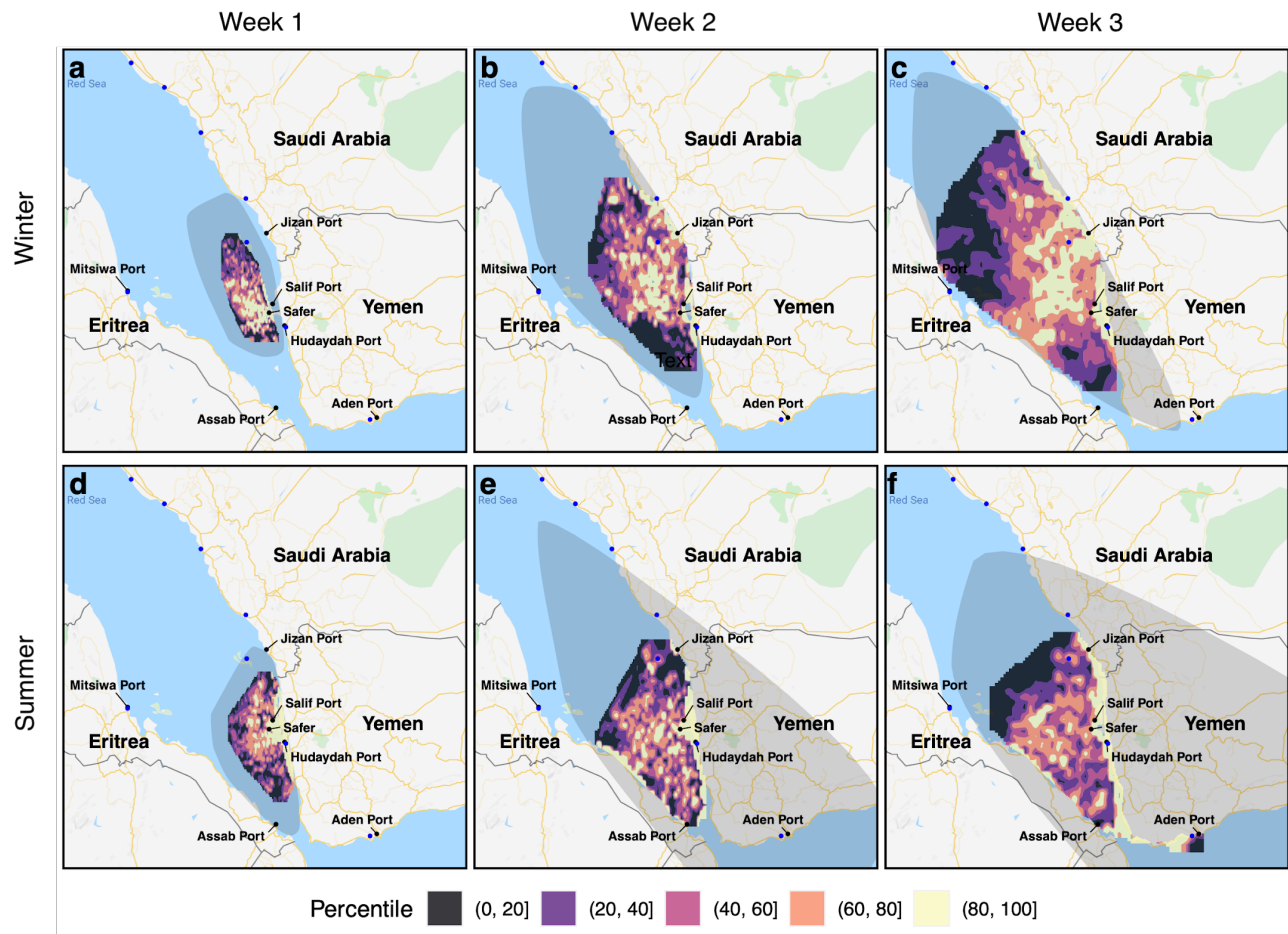

Figure 1: Projected oil spill trajectory plots in the winter (a,b,c) and summer (d,e,f). Columns denote trajectory after one week (a,d), two weeks (b,e), and three weeks (c,f). Colored contours represent percentiles of average surface concentration over 1000 simulations. Shaded region represents the area within which 90% of spill trajectories are expected to fall. Blue dots represent desalination plants.



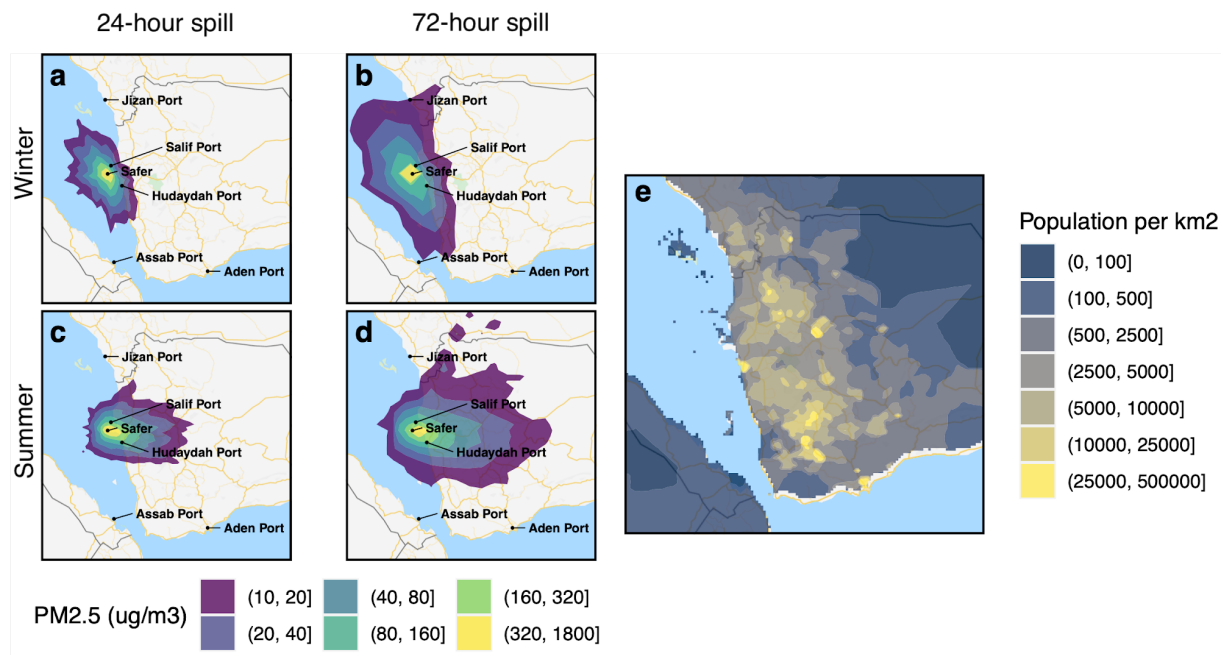

Figure 2: Projected 24-hour average air pollution concentration at the end of spill in the summer (a,b) and winter (c,d) for 24-hour spills (a,c) and 72-hour spills (b,d), alongside a population density plot (e).

### Acknowledgments

B.Q.H acknowledges support by the National Science Foundation Graduate Research Fellowship under Grant No. DGE 1656518 and the National Library of Medicine under Training Grant T15 LM 007033. A.M.M received funding from National Institutes of Health (NIH) NIAID T32AI007433. The contents of this article are solely the responsibility of the authors and do not necessarily represent the official views of the NIH. Funding sources had no role in the writing of this manuscript or the decision to submit for publication.

## Supplement for Public health impacts of an imminent Red Sea oil spill

Benjamin Q Huynh<sup>1</sup>, Laura H Kwong<sup>2</sup>, Mathew V Kiang<sup>3,4</sup>, Amir M Mohareb<sup>5,6</sup>, Aisha O Jumaan<sup>7</sup>, Sanjay Basu<sup>8,9,10,11</sup>, Pascal Geldsetzer<sup>12,13</sup>, Fatima M Karaki<sup>14\*</sup>, David H Rehkopf<sup>3\*</sup>

1 Department of Biomedical Data Science, Stanford University School of Medicine, Stanford, CA, USA

2 Woods Institute for the Environment, Stanford University, Stanford, CA, USA

3 Department of Epidemiology and Population Health, Stanford University School of Medicine, Stanford, CA, USA

4 Harvard FXB Center for Health and Human Rights, Harvard University, Boston, MA, USA

5 Division of Infectious Diseases, Massachusetts General Hospital, Boston, MA, USA

6 Department of Medicine, Harvard Medical School, Boston, MA, USA

7 Yemen Relief and Reconstruction Foundation, Mercer Island, WA, USA

8 Center for Primary Care, Harvard Medical School, Boston, MA, USA

9 Research and Population Health, Collective Health, San Francisco, CA, USA

10 School of Public Health, Imperial College, London, UK

11 Institute of Health Policy, Management & Evaluation, University of Toronto, Toronto, ON

12 Division of Primary Care and Population Health, Department of Medicine, Stanford University School of Medicine, Stanford, CA, USA

13 Heidelberg Institute of Global Health, Heidelberg University, Heidelberg, Germany

14 Refugee and Asylum seeker Health Initiative, Department of Medicine, University of California San Francisco, San Francisco, CA, USA

\*Equal contribution

### Background information

#### *Risk of spill*

Although we are unable to quantitatively estimate the risk of the *Safer* spilling, here we provide a brief qualitative review of the *Safer's* conditions. The *Safer* was abandoned in 2015 and has not been inspected or maintained since. It was designated out of class in 2016.<sup>1</sup> Concerns have arisen of a spill, whether through a leak via a damaged hull, or combustion from build-up of volatile gases aboard the ship. There have also been reports of explosive mines in the water near the *Safer*.<sup>2</sup> In the spring of 2019, a piece of *Safer's* offloading machinery broke off from rust and fell into the waters below. In May 2020, the *Safer* developed a leak, with seawater entering its engine room.<sup>3</sup> The high salinity levels of the Red Sea contribute to the rapid corrosion of the *Safer's* parts. United Nations officials have repeatedly attempted to negotiate access to inspect the *Safer*, but as of writing have been unable to do so. No discussions of long-term solutions, such as offloading the oil, have been publicly proposed.

#### *Port closures*

Our work assumes that if Hudaydah closes, then aid and imports will be severely disrupted. The reason for this is that Hudaydah is a key port - it receives 68% of food aid for all of Yemen (Yemen is reliant on imports for 88% of its food supply).<sup>4</sup> Aid in the form of fuel, food, and water is usually shipped from Djibouti, so ships would have to go around Africa to reach Hudaydah. Because of the ongoing blockade, aid access to Yemen is limited to a few ports. It is generally difficult to transport aid by land from Aden or Mukalla to North Yemen due to territorial conflicts as well as port capacity.<sup>4,5</sup> Closure of Red Sea ports for Yemen would thus severely hinder aid efforts.

## Data

For gridded wind data, we use the 2019 and 2020 hourly 31 kilometer surface wind ERA5 datasets from the European Centre for Medium-Range Weather Forecasts (ECMWF).<sup>6</sup> For gridded currents, sea temperature, and salinity data, we use 2019 and 2020 data from the Hybrid Coordinate Ocean Model.<sup>7</sup> For data on the properties of the oil, we use NOAA's Oil Library Project.<sup>8</sup> For data on fuel prices, we use a dataset from the World Food Programme.<sup>9</sup> We use fuel import data from the United Nations Verification and Inspection Mechanism for Yemen.<sup>10</sup> We used a variety of data sources for data on desalination plant locations and capacity (see Supplement Table 2).<sup>11-13</sup> For Yemen, not all locations of desalination plants were available, and the water capacities for the known plants were also unavailable. To estimate the water capacity for each of the known plants in Yemen, we used the most recent available data on country-wide desalination capacity,<sup>14</sup> and divided it equally amongst the known plants. Food import estimates were derived from Yemen's port data.<sup>4</sup>

## Methods

### *Oil spill and air pollution plots*

The averaging of oil spill and air pollution trajectories over simulations was done on a latitude-longitude grid rounded to three decimal points, corresponding to approximately 100 meters. To plot contours of our oil spill and air pollution models, we used bilinear interpolation to calculate values between points prior to plotting. Given the uncertainty in the amount of oil that will be spilled, we plotted our results in terms of relative values (percentiles) instead of absolute values (oil thickness).

We performed sensitivity analyses in terms of spill duration and season. Our original models assumed a 7-day spill; we repeated the models for a 24-hour spill. We also repeated the models for spring (March-May) and autumn (September-November). See Supplement Figures 3 and 4.

### *Air pollution calculations*

To get air pollution values in terms of fine particulate matter, we converted the initial oil release from barrels to micrograms, multiplied by the oil to particulate matter conversion rate calculated by Middlebrook et al,<sup>15</sup> divided by the length of the spill, and multiplied by the concentration values. We calculated the population-weighted average relative risk of the air pollution by multiplying the air pollution values by the relative risk and population share at each grid point. We restrict this calculation to populations exposed to at least 10 ug/m<sup>3</sup> of PM<sub>2.5</sub>. Due to uncertainty in the particulate matter conversion rate and the relative risk of cardiovascular and respiratory mortality from fine particulate matter, we repeat this process through Monte Carlo simulation, varying those two parameters over 1000 simulations to propagate uncertainty.

To propagate uncertainty, we varied two parameters over simulations: the rate of conversion from surfaced oil to fine particulate matter, and the relative risk (RR) of fine particulate matter

with respect to cardiovascular and respiratory hospitalizations. Based on the point estimates and confidence intervals (CIs) reported from existing literature, we adopted the methodology from Khomenko et al<sup>16</sup> and computed the RR standard deviations as:

$$\text{LN}(\text{RR upper CI} / \text{RR lower CI}) / (2 * \text{qnorm}(0.975))$$

We assumed normal distributions and sampled from the reported mean and estimated standard deviation. The standard deviation for the fine particulate matter conversion rate is provided so we used the reported estimate. We calculated the mean RR from our simulations and construct 95% confidence intervals assuming a normal distribution. If the lower CI for the simulated RR was less than 1, we assumed no increased risk of hospitalization.

We performed several sensitivity analyses (Supplement Tables 4 and 5). In addition to modeling 24-hour spills and 72-hour spills at different seasons, we also modeled pollution with and without combustion. For estimates of pollution from combustion, we added the burned oil to particulate matter conversion rate from Middlebrook et al to the existing evaporative conversion rate. We also varied the relative risk function, since the estimate we used from Burnett et al may not reflect the population in Yemen. We thus performed the above calculations using respiratory hospitalization rates from Wei et al and short-term PM2.5-related mortality rates from Kloog et al.<sup>17,18</sup> Wei et al use a Medicare population that is more vulnerable to air pollution - which may more accurately reflect the Yemeni population, of which many are malnourished and lack proper health services. Kloog et al use full mortality records from the state of Massachusetts, which may more accurately reflect the age-structure of Yemen.

Our air pollution concentration estimates are subject to uncertainty and lack of data. Our evaporation and combustion estimates are partially based on data from the *Deepwater Horizon*, which had light crude oil that was similar to the oil carried by the *Safer*. We do not fully propagate the uncertainty from our air pollution health effect estimates because our gridded population data does not include uncertainty estimates. We based our health impact assessments on single-pollutant health outcomes and do not explicitly model volatile organic compounds due to lack of data, but the PM2.5 from an oil spill is likely different from PM2.5 from other sources. Our modeling assumed the pollution is emitted from a single site (i.e. the site of the spill), but in reality it would be emitted from wherever the oil is spilled. Thus, our estimates of hospitalization rates are biased downwards, since the pollution would likely be slightly closer inland. It is also possible that the tanks aboard the *Safer* have already leaked, and that much of the light components of the oil have already evaporated, which would drastically reduce the amount of air pollution from the spill.

#### *Fuel price calculations*

We calculated the increase in fuel prices from the November 6-26 2017 full port closures in Al Hudaydah by taking the median price among diesel, petrol, and gas and comparing it between October 15 2017 and November 15 2017 (Supplement Figure 1).

### Food aid calculations

To calculate the amount of food aid disruption, we used 2019 data showing percentages of total food aid in Yemen originating from Hudaydah and Aden.<sup>4</sup> We then multiplied these percentages by the average of total people targeted for food assistance based on available situation reports from the World Food Programme ranging from March 2020 - February 2021. We calculated the 95% confidence interval of the mean with a one-sample *t*-test.

### Fish yield calculations

We calculated fishery disruption by using 2016 fish yield data.<sup>19</sup> We summed over all fishing sectors in the designated South Red Sea region for our South Red Sea estimate. For our estimate including the Gulf of Aden, we used the designated Gulf of Aden region, summed over all fishing sectors, and filtered for fish yield from the countries Yemen, Eritrea, or Djibouti to avoid including areas outside of the potential spill zone.

## Figures

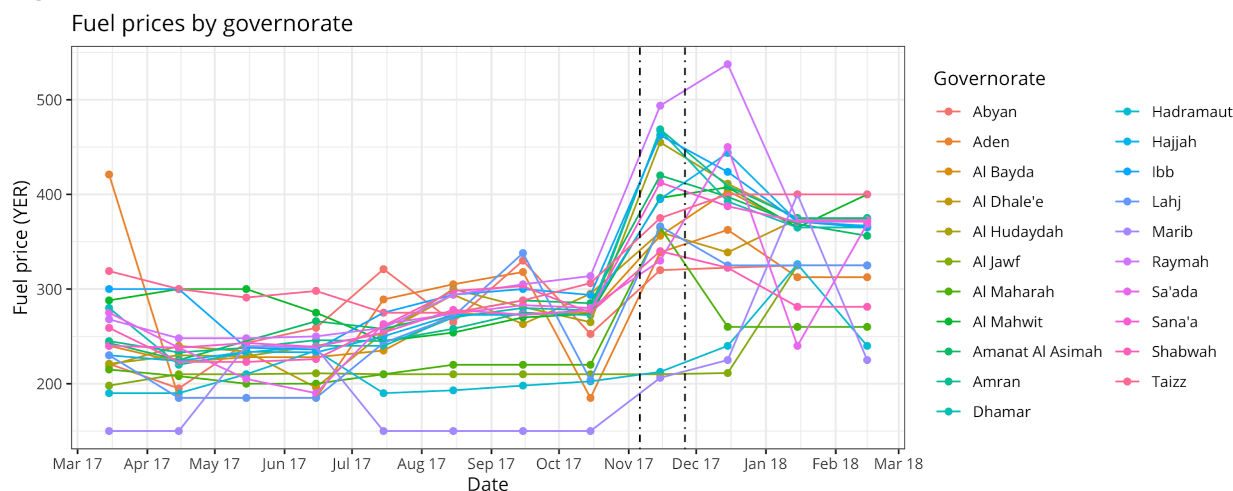

Supplement Figure 1: Fuel prices by governorate, March 2017 - March 2018. Dashed lines denote the start and end of full port closures in Yemen.

## Oil spill evaporation over time

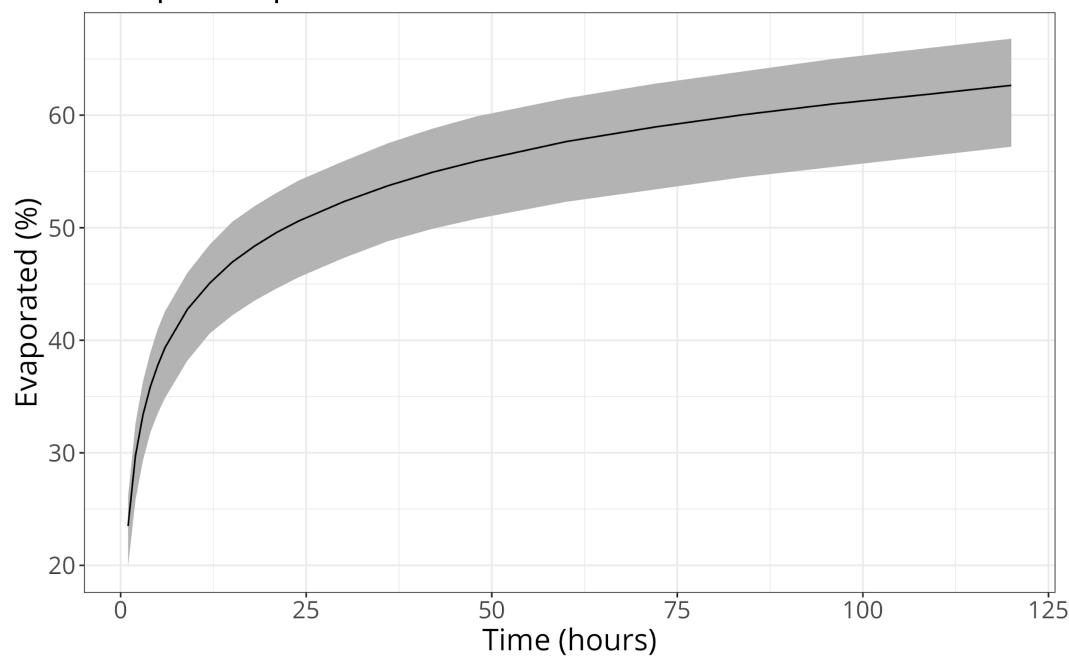

Supplement Figure 2: Oil spill evaporation over time. Black line indicates mean, and gray ribbon indicates minimum values and maximum values across 1000 Monte Carlo simulations.

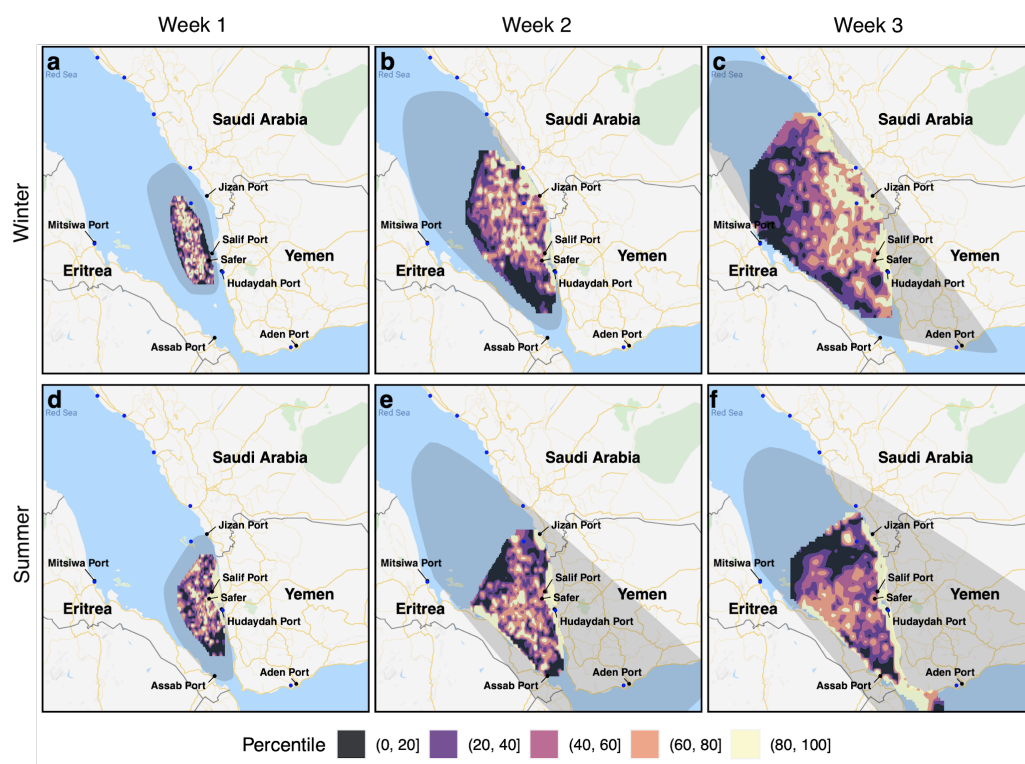

Supplement Figure 3: Projected oil spill trajectory plots in the winter (a,b,c) and summer (d,e,f), assuming a 24-hour spill duration. Columns denote trajectory after one week (a,d), two weeks

(b,e), and three weeks (c,f). Colored contours represent percentiles of average surface concentration over 1000 simulations. Shaded region represents the area within which 90% of spill trajectories are expected to fall. Blue dots represent desalination plants.

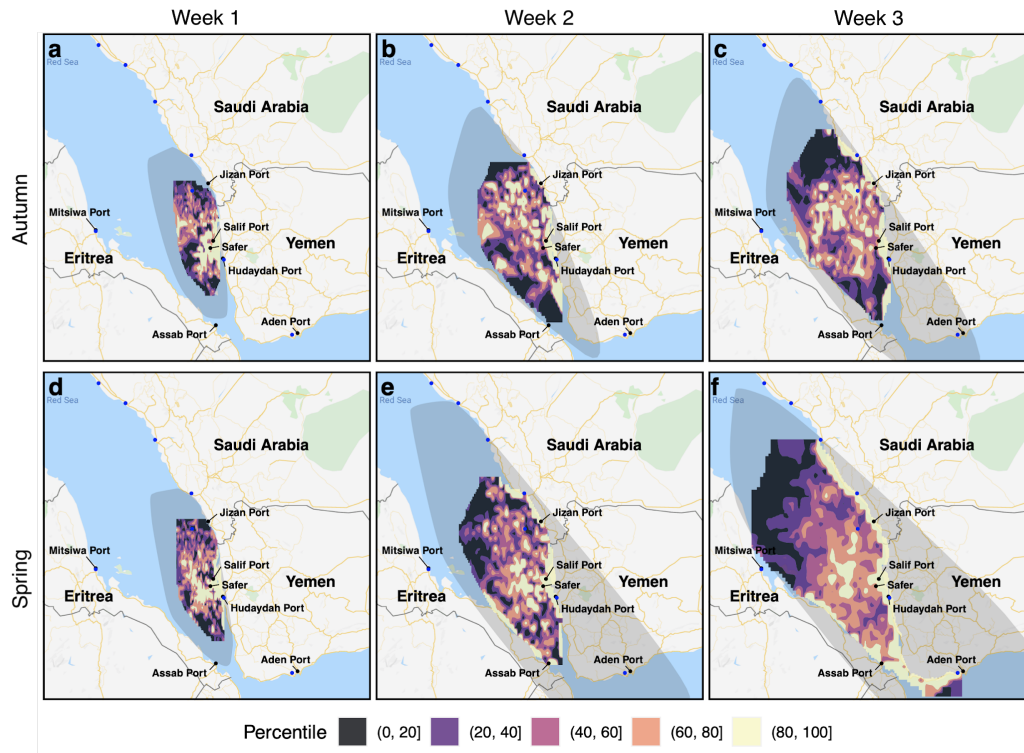

Supplement Figure 4: Projected oil spill trajectory plots in the autumn (a,b,c) and spring (d,e,f), assuming a 7-day spill duration. Columns denote trajectory after one week (a,d), two weeks (b,e), and three weeks (c,f). Colored contours represent percentiles of average surface concentration over 1000 simulations. Shaded region represents the area within which 90% of spill trajectories are expected to fall. Blue dots represent desalination plants.

## Tables

Supplement Table 1: Percentiles of oil surface concentration amongst exposed areas averaged over simulations at locations of interest.

| Location | Significance | Country      | Week 1<br>Summer | Week 2<br>Summer | Week 3<br>Summer | Week 1<br>Winter | Week 2<br>Winter | Week 3<br>Winter |
|----------|--------------|--------------|------------------|------------------|------------------|------------------|------------------|------------------|
| Hudaydah | Port         | Yemen        | 94               | 96               | 94               | 0                | 98               | 97               |
| Salif    | Port         | Yemen        | 84               | 90               | 88               | 0                | 91               | 94               |
| Aden     | Port         | Yemen        | 0                | 0                | 26               | 0                | 0                | 0                |
| Hudaydah | Desalination | Yemen        | 94               | 96               | 94               | 0                | 98               | 97               |
| Aden     | Desalination | Yemen        | 0                | 0                | 26               | 0                | 0                | 0                |
| Assab    | Port         | Eritrea      | 0                | 23               | 24               | 0                | 0                | 0                |
| Jizan    | Port         | Saudi Arabia | 0                | 83               | 87               | 0                | 95               | 99               |
| Farasan  | Desalination | Saudi Arabia | 0                | 55               | 66               | 0                | 65               | 70               |
| Shuqaiq  | Desalination | Saudi Arabia | 0                | 0                | 0                | 0                | 0                | 95               |
| Qunfudah | Desalination | Saudi Arabia | 0                | 0                | 0                | 0                | 0                | 85               |

Supplement Table 2: Locations and capacities of known desalination plants in the Southern Red Sea.

| Desalination plant | Country      | Coordinates          | Capacity (m <sup>3</sup> /day) |
|--------------------|--------------|----------------------|--------------------------------|
| Hirgigo            | Eritrea      | 15.580140, 39.449509 | 2,000                          |
| Farasan            | Saudi Arabia | 16.687464, 42.096350 | 9,000                          |
| Shuqaiq 1          | Saudi Arabia | 17.6599, 42.0761     | 94,000                         |
| Shuqaiq 2          | Saudi Arabia | 17.6599, 42.0761     | 216,000                        |
| Shuaiba            | Saudi Arabia | 20.675714, 39.528004 | 1,707,540                      |
| Qunfudah           | Saudi Arabia | 19.125537, 41.078224 | 9,000                          |



|          |              |                      |                    |
|----------|--------------|----------------------|--------------------|
| Al Lith  | Saudi Arabia | 20.130047, 40.266668 | 9,000              |
| Jeddah   | Saudi Arabia | 21.480555, 39.177983 | 663,532            |
| Aden     | Yemen        | 12.745462, 44.836638 | 34,000 (estimated) |
| Hudaydah | Yemen        | 14.800858, 42.966017 | 34,000 (estimated) |

Supplement Table 3: Population-weighted average relative risk and exposed populations for cardiovascular and respiratory hospitalizations from air pollution over various scenarios and spill durations. Spill duration is equivalent to exposure duration. All intervals denote 95% confidence intervals. Exposed population is defined as having been exposed to 10 ug/m<sup>3</sup> or more of PM<sub>2.5</sub>. Uses estimates from Burnett et al.<sup>20</sup>

| Scenario      | Average RR             | Population                      | Average RR (Fire)      | Population (Fire)                  |
|---------------|------------------------|---------------------------------|------------------------|------------------------------------|
| Summer, 24-hr | 31.65<br>(30.94,32.35) | 10956253<br>(10767808,11144698) | 41.99<br>(41.37,42.6)  | 13164783 (13062670,13266896)       |
| Winter, 24-hr | 16.1<br>(15.82,16.38)  | 3158784<br>(3082315,3235253)    | 19.58<br>(19.38,19.77) | 4358633 (4288267,4429000)          |
| Summer, 72-hr | 14.03<br>(13.77,14.3)  | 3135629<br>(3069896,3201362)    | 17.86<br>(17.61,18.11) | 3939688 (3898275,3981100)          |
| Winter, 72-hr | 5.86 (5.77,5.94)       | 713561<br>(680133,746989)       | 6.67<br>(6.63,6.72)    | 1366476<br>(1320471.36,1412482.18) |

Supplement table 4: Population-weighted average relative risk and exposed populations for respiratory hospitalizations from air pollution over various scenarios and spill durations. Spill duration is equivalent to exposure duration. All intervals denote 95% confidence intervals. Exposed population is defined as having been exposed to 10 ug/m<sup>3</sup> or more of PM<sub>2.5</sub>. Uses estimates from Wei et al.<sup>17</sup>

| Scenario      | Average RR             | Population                      | Fire RR                | Fire Population              |
|---------------|------------------------|---------------------------------|------------------------|------------------------------|
| Summer, 24-hr | 53.18<br>(50.4,55.96)  | 10968475<br>(10788492,11148458) | 73.05<br>(69.56,76.54) | 13247822 (13143549,13352095) |
| Winter, 24-hr | 27.51<br>(26.15,28.87) | 3117855<br>(3039294,3196417)    | 33.61<br>(32.07,35.14) | 4256849 (4187906,4325792)    |
| Summer, 72-hr | 23.89<br>(22.73,25.05) | 3063612<br>(2995334,3131890)    | 29.9<br>(28.51,31.29)  | 3920522 (3875663,3965381)    |
| Winter, 72-hr | 10.37<br>(9.89,10.85)  | 772798<br>(739520,806077)       | 11.42<br>(10.9,11.93)  | 1359411 (1314177,1404645)    |

Supplement table 5: Population-weighted average relative risk and exposed populations for cardiovascular and respiratory mortality from air pollution over various scenarios and spill durations. Spill duration is equivalent to exposure duration. All intervals denote 95% confidence intervals. Exposed population is defined as having been exposed to 10 ug/m<sup>3</sup> or more of PM<sub>2.5</sub>. Uses estimates from Kloog et al.<sup>18</sup>

| Scenario      | Average RR             | Population                      | Fire RR                | Fire Population              |
|---------------|------------------------|---------------------------------|------------------------|------------------------------|
| Summer, 24-hr | 26.73<br>(25.93,27.53) | 10845335<br>(10640116,11050555) | 34.98<br>(34.11,35.85) | 13106374 (13000034,13212715) |
| Winter, 24-hr | 13.55<br>(13.22,13.89) | 3163042<br>(3085851,3240232)    | 16.68<br>(16.33,17.04) | 4360401 (4292417,4428385)    |
| Summer, 72-hr | 11.75<br>(11.42,12.07) | 3115839<br>(3048469,3183210)    | 15.27<br>(14.91,15.63) | 3930801 (3888560,3973042)    |
| Winter, 72-hr | 5.04 (4.92,5.15)       | 757642<br>(723268,792016)       | 5.64<br>(5.53,5.75)    | 1355580 (1307569,1403592)    |

## References

1. FSO SAFER oil spill risk. <https://www.imo.org/en/MediaCentre/HotTopics/Pages/FSO-SAFER-oil-spill-risk.aspx>.
2. Onboard the FSO SAFER: A preview. *Atlantic Council*  
<https://www.atlanticcouncil.org/blogs/energysource/onboard-the-fso-safer-a-preview/> (2019).
3. Without Access to Stricken Oil Tanker off Yemen, Under-Secretary-General, Briefing Security Council, Warns of Environmental, Economic, Humanitarian Catastrophe | Meetings Coverage and Press Releases. <https://www.un.org/press/en/2020/sc14254.doc.htm>.
4. ACAPS. Yemen Food Supply Chain.  
[https://reliefweb.int/sites/reliefweb.int/files/resources/20201216\\_acaps\\_yemen\\_analysis\\_hub\\_food\\_supply\\_chain.pdf](https://reliefweb.int/sites/reliefweb.int/files/resources/20201216_acaps_yemen_analysis_hub_food_supply_chain.pdf) (2020).
5. United Nations OCHA. Humanitarian Needs Overview Yemen.  
[https://reliefweb.int/sites/reliefweb.int/files/resources/Yemen\\_HNO\\_2021\\_Final.pdf](https://reliefweb.int/sites/reliefweb.int/files/resources/Yemen_HNO_2021_Final.pdf) (2021).
6. The ERA5 global reanalysis - Hersbach - 2020 - Quarterly Journal of the Royal Meteorological Society - Wiley Online Library.  
<https://rmets.onlinelibrary.wiley.com/doi/full/10.1002/qj.3803>.
7. Chassignet, E. P. *et al.* The HYCOM (HYbrid Coordinate Ocean Model) data assimilative system. *J. Mar. Syst.* **65**, 60–83 (2007).
8. NOAA-ORR-ERD/OilLibrary. <https://github.com/NOAA-ORR-ERD/OilLibrary> (2020).
9. Global Food Prices Database (WFP) - Humanitarian Data Exchange.  
<https://data.humdata.org/dataset/wfp-food-prices>.
10. UNVIM. UNVIM Online Dashboard. *UNVIM Online Dashboard*  
[https://public.tableau.com/shared/23NRPS5WM?:embed=y&:showVizHome=no&:host\\_url=https%3A%2F%2Fpublic.tableau.com%2F&:embed\\_code\\_version=3&:toolbar=yes&:animate\\_transition=yes&:display\\_static\\_image=no&:display\\_spinner=no&:display\\_overlay=yes&:displa](https://public.tableau.com/shared/23NRPS5WM?:embed=y&:showVizHome=no&:host_url=https%3A%2F%2Fpublic.tableau.com%2F&:embed_code_version=3&:toolbar=yes&:animate_transition=yes&:display_static_image=no&:display_spinner=no&:display_overlay=yes&:displa)

y\_count=yes&publish=yes&:loadOrderID=0.

11. Mohammed H Bin Marshad, S. Economic evaluation of seawater desalination: a case study analysis of cost of water production from seawater desalination in Saudi Arabia.pdf. <https://core.ac.uk/download/pdf/77036159.pdf> (2014).
12. Al-Mutaz, I. S. Features of multi-effect evaporation desalination plants. *Desalination Water Treat.* **54**, 3227–3235 (2015).
13. Ahmed, A.-E.-W. Cooperation Council for the Arab States of the Gulf (GCC). in *Max Planck Encyclopedia of Public International Law* (Oxford University Press, 2014). doi:10.1093/law:epil/9780199231690/e604.
14. Frenken, K. & Food and Agriculture Organization of the United Nations. *Irrigation in the Middle East Region in figures: AQUASTAT survey - 2008*. (Food and Agriculture Organization of the United Nations, 2009).
15. Middlebrook, A. M. *et al.* Air quality implications of the Deepwater Horizon oil spill. *Proc. Natl. Acad. Sci.* (2011) doi:10.1073/pnas.1110052108.
16. Khomenko, S. *et al.* Premature mortality due to air pollution in European cities: a health impact assessment. *Lancet Planet. Health* **0**, (2021).
17. Wei, Y. *et al.* Short term exposure to fine particulate matter and hospital admission risks and costs in the Medicare population: time stratified, case crossover study. *BMJ* l6258 (2019) doi:10.1136/bmj.l6258.
18. Kloog, I., Ridgway, B., Koutrakis, P., Coull, B. A. & Schwartz, J. D. Long- and Short-Term Exposure to PM<sub>2.5</sub> and Mortality. *Epidemiol. Camb. Mass* **24**, 555–561 (2013).
19. Palomares, M. L. D. *et al.* Fishery biomass trends of exploited fish populations in marine ecoregions, climatic zones and ocean basins. *Estuar. Coast. Shelf Sci.* **243**, 106896 (2020).
20. Burnett, R. T., Smith-doiron, M., Stieb, D., Cakmak, S. & Brook, J. R. Effects of Particulate and Gaseous Air Pollution on Cardiorespiratory Hospitalizations. *Arch. Environ. Health Int. J.* **54**, 130–139 (1999).
